# Supplementary material
Source: publisher figshare collection journal article supplement (https://tandf.figshare.com/ndownloader/files/12939782)
Supplement: Supplementary file 1 [file 12939782]

**Supplementary Material**

Synthesis and characterization of a novel Mn(III)-(γ-diketone) complex with catalytic and antifungal activity

PRITI DUBEY and SUDHA YADAVA*


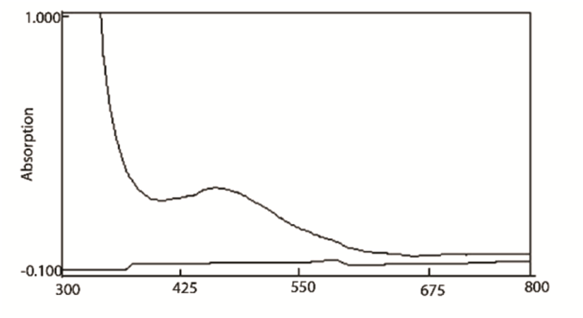


Figure S1. UV-Visible spectrum of [Mn(hdo)3] complex.


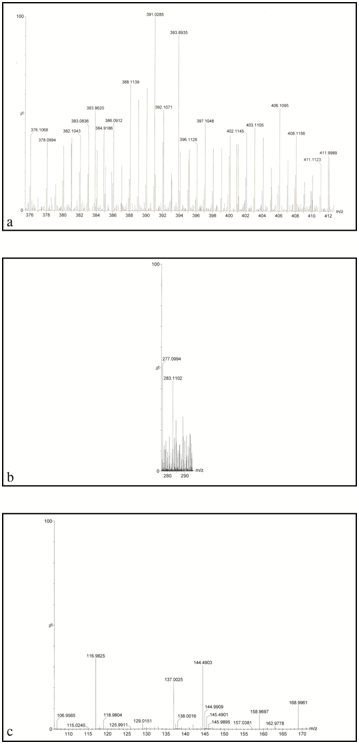


Figure S2. (a) ESI-mass spectrum of [Mn(C18H30O6] complex; (b) ESI-mass spectrum of [Mn(C12H20O4] complex; (c) ESI-mass spectrum of [Mn(C6H10O2] complex.


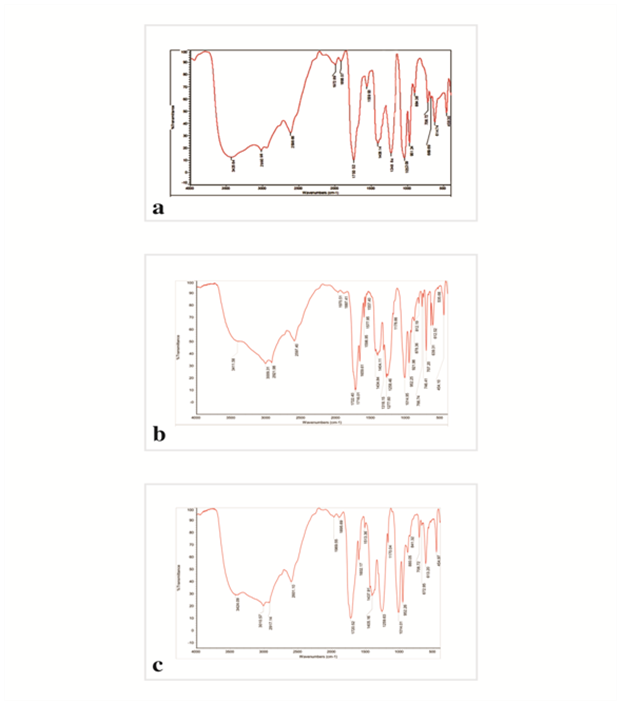


Figure S3. (a) FT-IR spectrum of methyl acetate, (b) phenyl benzoate and (c) 4-hydroxyphenyl acetate.


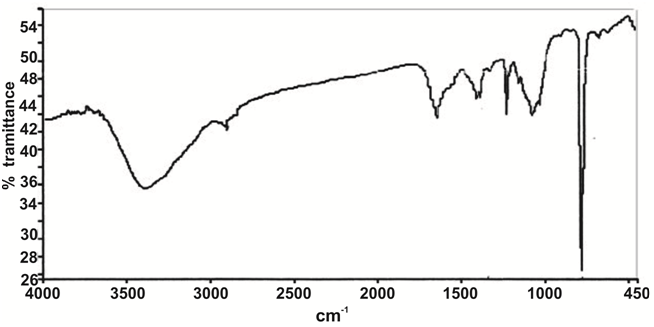


Figure S4. IR-spectra of catalyst after reaction.
